# Supplementary material
Source: PubMed Central journal article supplement (PMC9840156)
Supplement: NIHMS1860434-supplement-supplementary_data.pdf [file NIHMS1860434-supplement-supplementary_data.pdf]

**SUPPORTING INFORMATION**

**Ganglioside enriched phospholipid vesicles induce cooperative  
A $\beta$  oligomerization and membrane disruption**

**Jhinuk Saha<sup>1</sup>, Priyankar Bose<sup>3</sup>, Shailendra Dhakal<sup>2</sup>, Preetam Ghosh<sup>3</sup> and Vijayaraghavan  
Rangachari<sup>1,2\*</sup>**

<sup>1</sup>Department of Chemistry and Biochemistry, School of Mathematics and Natural Sciences,  
University of Southern Mississippi, Hattiesburg MS 39406, USA and

<sup>2</sup>Center for Molecular and Cellular Biosciences, University of Southern Mississippi, Hattiesburg  
MS 39406, USA.

<sup>3</sup> Department of Computer Science, Virginia Commonwealth University, Richmond VA 23220

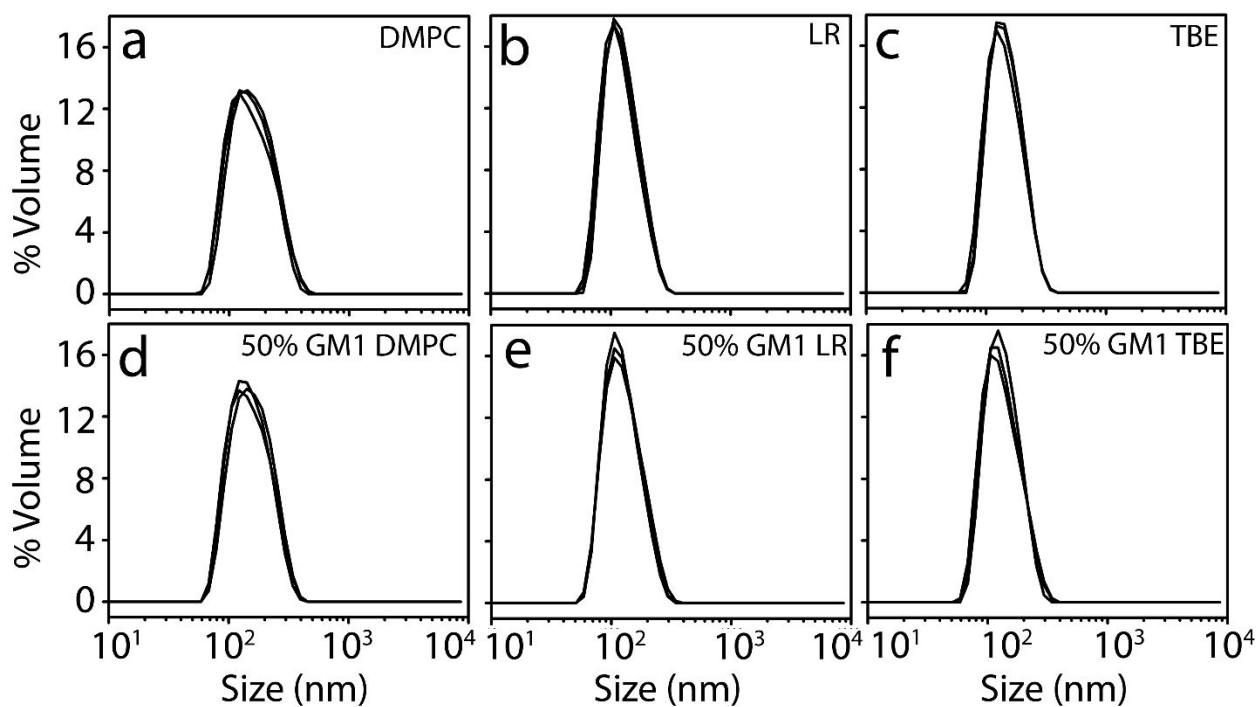

**Figure S1:** DLS of (0.2 mg/mL) DMPC, LR and TBE LUVs with (a, b, and c) or without (d, e, and f) GM1 extruded with 200 nm pore-sized polycarbonate membrane.

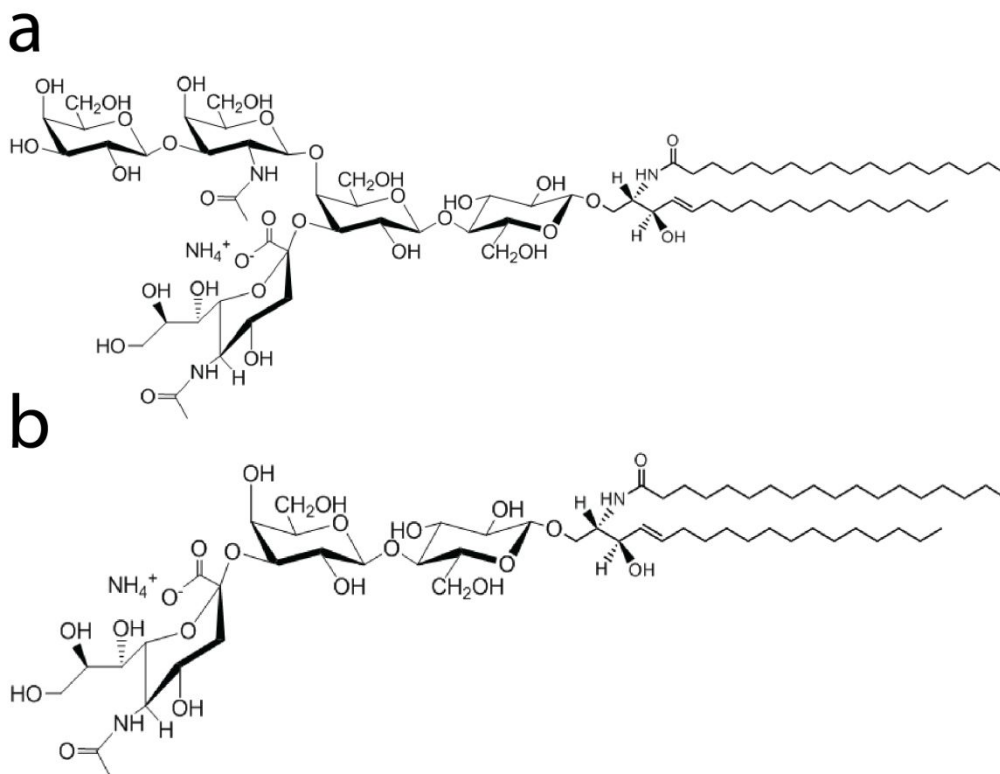

**Figure S2:** Representative structures of (a) GM1 and (b) GM3 gangliosides

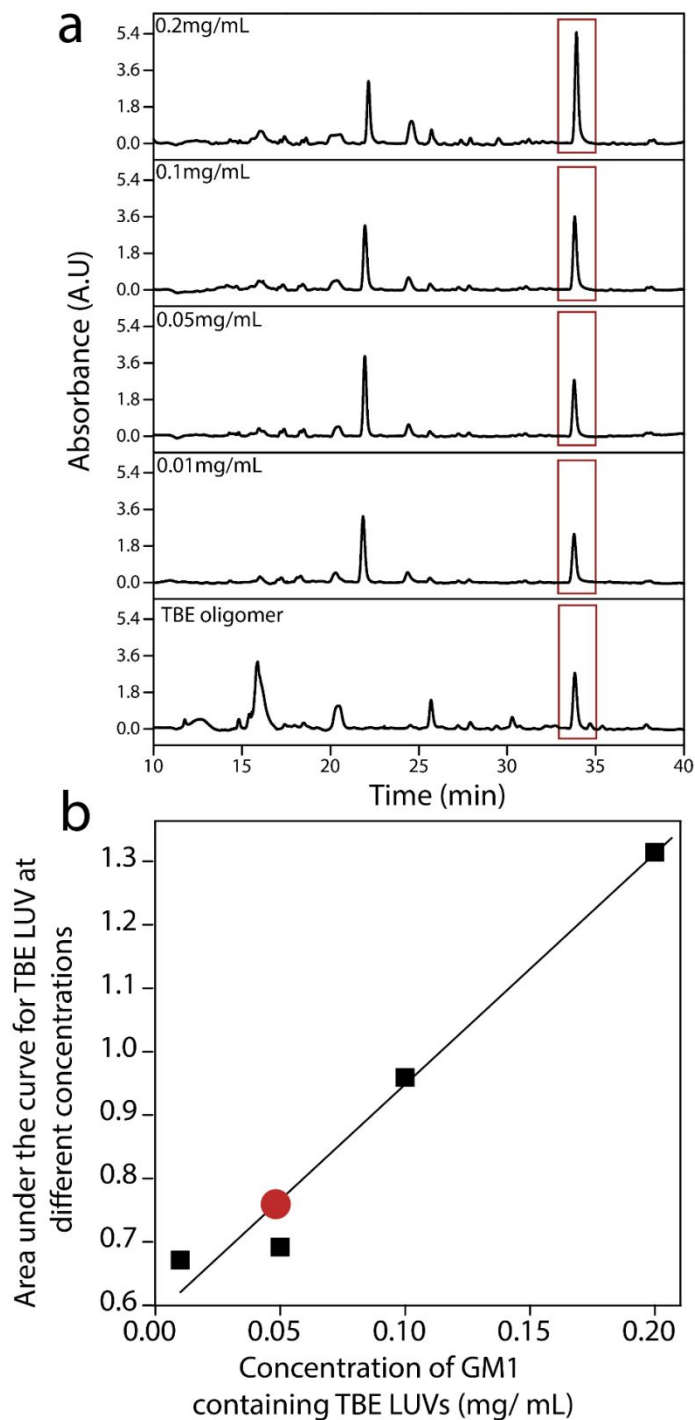

**Figure S3:** Quantification of lipid present within oligomers isolated from 50% GM1 doped TBE LUV and A $\beta$  reaction incubated for 5h. a) HPLC chromatograms of TBE LUV at concentration of 0.2, 0.1, 0.05 and 0.01 mg/mL respectively were used to plot the (b) Standard curve for TBE lipid. 5 $\mu$ M of isolated oligomer from 50% GM1 doped TBE LUV (last panel in (a)) and A $\beta$  reaction was run on HPLC and peak

corresponding to the TBE LUV was quantified using the standard curve plotted with TBE LUV (● in red in (b)).

| Parameter/Metric                                    | Value    |
|-----------------------------------------------------|----------|
| $k_{fb}^{on}$ (in $\text{h}^{-1}\mu\text{M}^{-1}$ ) | 15943.04 |
| $k^{on}$                                            | 15033.80 |
| $k_{nu}^{on}$ (in $\text{h}^{-1}\mu\text{M}^{-1}$ ) | 20.10    |
| $k_{fb-}^{on}$ (in $\text{h}^{-1}$ )                | 16.50    |
| $k_{nu-}^{on}$ (in $\text{h}^{-1}$ )                | 2.46     |
| SSE                                                 | 0.02     |

**Table S1:** Table showing the parameter/metric values in case of the control data.

| Parameter/Metric                                   | Value    |
|----------------------------------------------------|----------|
| $k_1^{off}$                                        | 1723.83  |
| $k_1^{con}$ (in $\text{h}^{-1}\mu\text{M}^{-1}$ )  | 25.55    |
| $k^{el}$ (in $\text{h}^{-1}\mu\text{M}^{-1}$ )     | 21310.81 |
| $k_-^{el}$ (in $\text{h}^{-1}$ )                   | 0.0037   |
| $k_{\mp}$ (in $\text{h}^{-1}\mu\text{M}^{-1}$ )    | 88.49    |
| $k^{nu}$ (in $\text{h}^{-1}\mu\text{M}^{-1}$ )     | 0.1009   |
| $k_-^{nu}$ (in $\text{h}^{-1}$ )                   | 1E-05    |
| $k_2^{off}$                                        | 4.94     |
| $k_-$ (in $\text{h}^{-1}$ )                        | 3.33     |
| $k_2^{con}$ (in $\text{h}^{-1}\mu\text{M}^{-1}$ )  | 95.21    |
| $k_1^{con'}$ (in $\text{h}^{-1}$ )                 | 11.26    |
| $k_2^{con'}$ (in $\text{h}^{-1}\mu\text{M}^{-1}$ ) | 99.99    |

|                         |        |
|-------------------------|--------|
| $L$ (in $\mu\text{M}$ ) | 0.0085 |
| SSE                     | 0.047  |

**Table S2:** Table showing the parameter/metric values in case of the oligomerization data with 0% GM1 lipids and monomers.

| Parameter/Metric                                  | Value   |
|---------------------------------------------------|---------|
| $k_1^{off}$                                       | 31.44   |
| $k_1^{con}$ (in $\text{h}^{-1}\mu\text{M}^{-1}$ ) | 1.39    |
| $k^{el}$ (in $\text{h}^{-1}\mu\text{M}^{-1}$ )    | 319.64  |
| $k_-^{el}$ (in $\text{h}^{-1}$ )                  | 25.94   |
| $k_+$ (in $\text{h}^{-1}\mu\text{M}^{-1}$ )       | 2769.54 |
| $k^{nu}$ (in $\text{h}^{-1}\mu\text{M}^{-1}$ )    | 165.99  |
| $k_-^{nu}$ (in $\text{h}^{-1}$ )                  | 0.457   |
| $k_2^{off}$                                       | 11.86   |
| $k_-$ (in $\text{h}^{-1}$ )                       | 21.49   |
| $k_1^{con}$ (in $\text{h}^{-1}\mu\text{M}^{-1}$ ) | 4.48    |
| $k_2^{con}$ (in $\text{h}^{-1}\mu\text{M}^{-1}$ ) | 99.48   |
| $k_3^{con}$ (in $\text{h}^{-1}\mu\text{M}^{-1}$ ) | 51.36   |
| $k_4^{con}$ (in $\text{h}^{-1}\mu\text{M}^{-1}$ ) | 1.59    |
| $k_2^{con}$ (in $\text{h}^{-1}\mu\text{M}^{-1}$ ) | 7.158   |
| $k_3^{con}$ (in $\text{h}^{-1}\mu\text{M}^{-1}$ ) | 74.25   |
| $k_4^{con}$ (in $\text{h}^{-1}\mu\text{M}^{-1}$ ) | 95.12   |
| $L$ (in $\mu\text{M}$ )                           | 0.044   |

|     |      |
|-----|------|
| SSE | 0.12 |
|-----|------|

**Table S3:** Table showing the parameter/metric values in case of the oligomerization data with 50% GM1 lipids and monomers.

| Parameter/Metric                                   | Value (Unsonicated) | Value (Sonicated) |
|----------------------------------------------------|---------------------|-------------------|
| $k_+$ (in $\text{h}^{-1}\mu\text{M}^{-1}$ )        | 48.522              | 48.88             |
| $k_2^{off}$                                        | 4.844               | 4.89              |
| $k_-$ (in $\text{h}^{-1}$ )                        | 0.20                | 0.20              |
| $k_1^{con'}$ (in $\text{h}^{-1}\mu\text{M}^{-1}$ ) | 1.77                | 1.40              |
| $k_2^{con'}$ (in $\text{h}^{-1}\mu\text{M}^{-1}$ ) | 71.13               | 67.71             |
| L (in $\mu\text{M}$ )                              | 0.08                | 0.1               |
| SSE                                                | 0.12                | 0.10              |

**Table S4:** Table showing the parameter/metric values in case of the oligomerization data with 0% GM1 lipids and fibrils.

| Parameter/Metric                                   | Value (Unsonicated) | Value (Sonicated) |
|----------------------------------------------------|---------------------|-------------------|
| $k_+$ (in $\text{h}^{-1}\mu\text{M}^{-1}$ )        | 49.92               | 47.38             |
| $k_2^{off}$                                        | 5.11                | 4.15              |
| $k_-$ (in $\text{h}^{-1}$ )                        | 0.52                | 0.23              |
| $k_1^{con'}$ (in $\text{h}^{-1}\mu\text{M}^{-1}$ ) | 2.54                | 2.86              |
| $k_2^{con'}$ (in $\text{h}^{-1}\mu\text{M}^{-1}$ ) | 52.64               | 20.85             |
| L (in $\mu\text{M}$ )                              | 0.06                | 0.06              |
| $k_3^{con'}$ (in $\text{h}^{-1}\mu\text{M}^{-1}$ ) | 0.5                 | 14.30             |

|                                                   |      |      |
|---------------------------------------------------|------|------|
| $k_4^{con}$ (in $\text{h}^{-1}\mu\text{M}^{-1}$ ) | 0.5  | 100  |
| SSE                                               | 0.04 | 0.04 |

**Table S5:** Table showing the parameter/metric values in case of the oligomerization data with 50% GM1 lipids and fibrils.

| No of pores | Oligomer size | SSE           |
|-------------|---------------|---------------|
| 1           | 2             | 0.0591        |
| 1           | 3             | 0.0777        |
| 1           | 4             | 0.1033        |
| 1           | 5             | 0.1308        |
| 1           | 6             | 0.0747        |
| <b>2</b>    | <b>2</b>      | <b>0.0473</b> |
| 2           | 3             | 0.0535        |
| 2           | 4             | 0.0867        |
| 2           | 5             | 0.1288        |
| 2           | 6             | 0.1756        |
| 3           | 2             | 0.0509        |
| 3           | 3             | 0.0603        |
| 3           | 4             | 0.0879        |
| 3           | 5             | 0.1237        |
| 3           | 6             | 0.1830        |

**Table S6:** Table showing the SSE values with the variation in the number of holes and the first oligomer in case of the oligomerization data with 0% GM1 lipids and fibrils.

| No of pores | Oligomer size | SSE    |
|-------------|---------------|--------|
| 3           | 2             | 0.4814 |
| 3           | 3             | 0.2472 |
| 3           | 4             | 0.1518 |
| 3           | 5             | 0.2610 |
| 3           | 6             | 0.3846 |
| 3           | 7             | 0.4954 |

|          |          |               |
|----------|----------|---------------|
| 3        | 8        | 0.6053        |
| 4        | 2        | 0.1887        |
| <b>4</b> | <b>3</b> | <b>0.1200</b> |
| 4        | 4        | 0.1620        |
| 4        | 5        | 0.1917        |
| 4        | 6        | 0.3725        |
| 4        | 7        | 0.4367        |
| 4        | 8        | 0.6692        |
| 5        | 2        | 0.3388        |
| 5        | 3        | 0.1705        |
| 5        | 4        | 0.2025        |
| 5        | 5        | 0.2028        |
| 5        | 6        | 0.3279        |
| 5        | 7        | 0.3507        |
| 5        | 8        | 0.4763        |

**Table S7:** Table showing the SSE values with the variation in the number of holes and the first oligomer in case of the oligomerization data with 50% GM1 lipids and fibrils.
